1  
2  
3  
4  
5  
6  
7  
8  
9  
10  
11  
12  
13  
14  
15  
16  
17  
18  
19  
20  
21  
22  
23  
24  
25  
26  
27  
28  
29  
30  
31  
32  
33

***Escherichia coli* ribosomal protein S1 enhances the kinetics of ribosome biogenesis and RNA decay.**

Mérodie Duval<sup>1‡</sup>, Karine Prévost<sup>2‡</sup>, Katarzyna J. Bandyra<sup>4</sup>, Anne Catherine Helfer<sup>1</sup>, Alexey Korepanov<sup>3</sup>, Latifa Bakhti<sup>2</sup>, Lauriane Kuhn<sup>5</sup>, Mathias Springer<sup>3</sup>, Pascale Romby<sup>1</sup>, Ben F. Luisi<sup>4</sup>, Eric Massé<sup>2\*</sup>, and Stefano Marzi<sup>1\*</sup>

<sup>1</sup>Architecture et Réactivité de l'ARN, Université de Strasbourg, IBMC-CNRS, F-67084 Strasbourg, France; <sup>2</sup>Université de Sherbrooke, CRCHUS, Faculty of Medicine and Health Sciences, Department of Biochemistry and Functional Genomics, RNA Group, 3201 Jean Mignault Street, Sherbrooke, Quebec, Canada, J1E 4K8; <sup>3</sup>Institut de Biologie Physico-Chimique CNRS, 75005; <sup>4</sup>Department of Biochemistry, University of Cambridge, Tennis Court Road, Cambridge CB2 1GA, UK; <sup>5</sup>Plateforme protéomique Strasbourg-Esplanade, IBMC-CNRS, Strasbourg, France.

<sup>‡</sup> These authors contributed equally to the work.

\* To whom correspondence should be addressed: [s.marzi@ibmc-cnrs.unistra.fr](mailto:s.marzi@ibmc-cnrs.unistra.fr); [Eric.Masse@USherbrooke.ca](mailto:Eric.Masse@USherbrooke.ca).

**Running title:** Ribosomal protein S1 in RNA decay and processing

**Keywords:** ribosomal protein S1, sRNA-dependent regulation, mRNA turnover, rRNA maturation, RNA chaperone

34 **Summary (215 words)**

35 *Escherichia coli* ribosomal protein S1 is essential for translation initiation of mRNAs and  
36 for cellular viability. Two oligonucleotide binding (OB)-fold domains located in the C-  
37 terminus of S1 are dispensable for growth, but their deletion causes a cold-shock  
38 phenotype, loss of motility and deregulation of RNA mediated stress responses.  
39 Surprisingly, the expression of the small regulatory RNA RyhB and one of its repressed  
40 target mRNA, *sodB*, are enhanced in the mutant strain lacking the two OB domains. Using  
41 *in vivo* and *in vitro* approaches, we show that RyhB retains its capacity to repress  
42 translation of target mRNAs in the mutant strain but becomes deficient in triggering rapid  
43 turnover of those transcripts. In addition, the mutant is defective in of the final step of the  
44 RNase E-dependent maturation of the 16S rRNA. This work unveils an unexpected  
45 function of S1 in facilitating ribosome biogenesis and RyhB-dependent mRNA decay  
46 mediated by the RNA degradosome. Through its RNA chaperone activity, S1 participates  
47 to the coupling between ribosome biogenesis, translation, and RNA decay.

48

49

## 50 Introduction

51

52 Translation initiation is the rate limiting step of protein synthesis and is regulated in  
53 various ways throughout all domains of life (1-7). In bacteria, many messenger RNAs  
54 (mRNAs) carry regulatory elements that directly sense the environmental cues or that  
55 are specifically recognized by a variety of trans-acting ligands (sRNAs, RNA-binding  
56 proteins) to regulate translation initiation. Some of these regulatory elements are  
57 characterized by structures that potentially interfere with ribosome recognition. *E. coli*  
58 ribosomal protein S1 (r-protein S1) is one of the key proteins involved in translation  
59 initiation, primarily through its action to help recruit and correctly position mRNAs  
60 carrying structured 5'UTRs or/and with suboptimal Shine and Dalgarno (SD) sequences  
61 (7-11). Several studies have shown that S1 contributes an RNA melting activity (12-16)  
62 that may facilitate the early steps of translation initiation (7). Besides its critical role in  
63 translation, the r-protein S1 has been implicated in other cellular processes, such as  
64 transcription recycling (17), rescuing of stalled ribosomes by tmRNA (18-21), and  
65 repressing its own expression (22). In cooperation with r-protein S2, it inhibits the  
66 translation of *rpsB* mRNA (23). Overproduction of S1 stabilizes *pnp* mRNA, encoding the  
67 exoribonuclease polynucleotide phosphorylase(24), as well as protection of specific  
68 mRNAs against RNase E attack (25). Finally, r-protein S1 is also part of various multi-  
69 protein complexes, one of which assists the degradation of mRNAs by RegB  
70 endoribonuclease (26) while another is required for replication of the Q $\beta$  phage (27-30).

71 In *E. coli*, S1 protein is composed of 6 oligonucleotide binding (OB)-fold domains,  
72 which are conserved among Gram-negative bacteria and few Gram-positive bacteria  
73 (31). The N-terminal domains 1 and 2 are responsible for ribosome binding (7, 32-35),  
74 and the minimal r-protein S1 that is required for translation initiation of many mRNAs is  
75 composed of domains 1 to 4 (7, 22, 28). These four domains are also essential for cell  
76 viability (7). However, the role of domains 5 and 6 of S1 remains less clear. Domain 5 is  
77 almost identical to domain 4 and reinforces the RNA binding capacity (7, 28, 31, 32), and  
78 domain 6 may participate in the recycling of RNA polymerase (17). A phylogenetic  
79 analysis revealed that this C-terminal domain is conserved in *Enterobacteriaceae* (31).  
80 The deletion of the last two C-terminal domains of *E. coli* S1 led to a viable mutant

81 strain, albeit with a slower growth and a cold-sensitive phenotype (7, 36).

82 In this work, we have addressed the functions of the last two domains of *E. coli* r-  
83 protein S1. Comparative proteomic and RNA-seq analysis performed on the wild-type  
84 strain and the mutant strains depleted of domain 6 (*rpsAΔ6*), or of both domains 5 and 6  
85 (*rpsAΔ56*) revealed an increased expression of a large set of genes responding to various  
86 stresses, and a reduced expression of most motility genes. Moreover, the expression of  
87 many sRNAs was more abundant in the mutant strains such as RyhB, which is one of the  
88 best characterized sRNA in *E. coli*. Strikingly, the expression of many of the RyhB-  
89 repressed targets was also enhanced in the mutant strains despite the higher levels of  
90 that sRNA. Remarkably, although the effect of RyhB on mRNA binding and translation  
91 was not altered, there was strong impairment in degradation of the repressed mRNAs by  
92 the RNA degradosome. Furthermore, our results also showed that the 16S rRNA  
93 maturation was slower in the absence of both domains 5 and 6 of S1. We describe a  
94 functional link between the C-terminal domains of S1 and the RNA degradosome and  
95 that kinetic of mRNA degradation and rRNA maturation assisted by r-protein S1 is an  
96 important feature for bacterial fitness.

97

## 98 **Results**

99

### 100 **Deletion of the last two domains of S1 deregulates regulatory RNAs and genes for stress** 101 **responses and motility**

102 Various mutant strains were previously constructed where the OB-fold domains  
103 were successively depleted from the C-terminus (**Figure S1A**) (7). The mutant strains  
104 were sequenced to verify that no additional mutation, acting as suppressors, had  
105 occurred. The only viable mutants were those deleted for domain 6 alone (*rpsAΔ6*), and  
106 for domains 5 and 6 together (*rpsAΔ56*) even though they harbored an increased  
107 doubling time and a longer lag phase than the WT strain (**Figure S1B**). Phenotypic assays  
108 were performed to monitor the motility of the WT and mutant strains (**Figure S1C**).  
109 Using semisolid agar plates to measure the characteristic chemotactic rings of the  
110 bacterial colonies produced by bacterial swarming, the *rpsAΔ6* and *rpsAΔ56* mutant  
111 strains showed less colony spreading, reflecting defect in motility. We then measured  
112 single cell swimming ability by tracking movements of several bacteria in liquid medium

113 under the microscope for the WT and *rpsAΔ56* strains (**Figure S1D**). For the WT strain, a  
114 classical behavior was observed with tracks corresponding to both swimming and  
115 tumbling, while in striking contrast the *rpsAΔ56* mutant strain reproducibly remained  
116 motionless.

117 Because both mutant strains have similar phenotypic behaviors, we analyzed the  
118 effect of the deletion of the two last C-terminal domains of S1 on gene expression using  
119 differential transcriptomics and proteomics. Label-free mass spectrometry performed on  
120 the *rpsAΔ56* mutant and the isogenic WT strains identified 342 proteins, which were  
121 significantly altered in relative abundance in the mutant strain (threshold 2-fold, p-  
122 values  $\leq 0.05$ , **Figure 1A** and **Table S1**), representing 23% of the total detected proteins  
123 (1509). Using RNA-Seq, 835 RNAs were identified with altered expression in *rpsAΔ56*  
124 mutant strain (threshold 2-fold, p-values  $\leq 0.05$ , **Figure 1B** and **Table S2**), representing  
125 19% of the detected transcripts (4442). The two approaches were particularly well  
126 correlated for genes encoding proteins involved in motility (FliC, FliG, FlhC) and  
127 chemotaxis (CheZ, CheR, CheA) (**Table 1**). Indeed, the decreased yields of these mRNAs  
128 were accompanied by a strong drop of the levels of the corresponding proteins in the  
129 *rpsAΔ56* mutant strain.

130 The steady state levels of a significant number of mRNAs involved in various  
131 stress responses were enhanced in the *rpsAΔ56* mutant strain. These mRNAs encoded  
132 proteins that are involved in heat shock, osmotic stress, iron metabolism, oxidative  
133 stress, and SOS responses (**Figure 1B** and **Table S2**). In addition, the level of two sRNAs  
134 was lower while the expression of 30 sRNAs was slightly enhanced in the mutant strain  
135 (**Figure 1B** and **Table S2**). Among these sRNAs, RyhB was the second most upregulated  
136 sRNA (**Table S2**). Since RyhB-dependent repression is often associated with rapid  
137 depletion of the mRNA targets, we analyzed more precisely the expression of the known  
138 RyhB-dependent targets (**Table S3**). However, the comparison between transcriptomic  
139 and proteomic analysis in WT and *rpsAΔ56* mutant strains revealed complex responses  
140 (**Table S3**). The yields of few mRNAs (*flgA*, *cydA*, *cra*) were slightly decreased in the  
141 mutant strain accompanied with a decreased of the protein levels, in agreement with  
142 higher yields of RyhB in the mutant strain. However, several mRNA levels remained  
143 unchanged (i.e., *frdA*, *isca*, *fumA*, *bfr*, *nuoF*) or were slightly enhanced (*sdhB*) while the

144 protein yields were significantly reduced in the mutant strain (**Table S3**). The fact that  
145 these RyhB-dependent mRNA targets are not degraded in the mutant strain is not  
146 attributable to a decreased level of RNase E or PNPase, which are similar to those of the  
147 WT strain (**Table S1**). These data suggested that the full length S1 protein might be  
148 required for rapid depletion of mRNAs targeted for repression by some sRNAs.

149 We next explored the possible action of S1 in RyhB-dependent regulation under  
150 conditions where RyhB exerts its regulatory functions, i.e., depletion of iron.

151

### 152 **RyhB-dependent *sodB* repression is altered in the mutant strain**

153 Because S1 is dispensable for *sodB* translation initiation (7), we first analyzed the  
154 role of S1 in RyhB-dependent regulation of *sodB*. The effect of RyhB expression on *sodB*  
155 mRNA levels was monitored in the WT and mutant *rpsA*Δ56 strains. After purification of  
156 total RNAs at several time points, Northern blot assays were performed with probes  
157 complementary to either *sodB* or RyhB (**Figure 2A**). As a loading control, we probed for  
158 5S rRNA (**Figure S2A**). As described previously, RyhB expression was induced by the  
159 addition of the iron chelator 2,2'-dipyridyl (Dip.) in the medium (37) (**Figure 2A**). After 5  
160 min, the medium was supplemented with sufficient iron sulfate (FeSO<sub>4</sub>) to inhibit RyhB  
161 synthesis. As expected, in the WT strain, *sodB* levels dropped immediately upon RyhB  
162 induction and were restored upon the addition of iron. In contrast, high levels of *sodB*  
163 were constantly observed in the *rpsA*Δ56 mutant strain whatever the induction or the  
164 repression of RyhB synthesis. Upon addition of iron, RyhB remained detectable for a  
165 longer time in the *rpsA*Δ56 mutant strain than in the WT strain, in agreement with the  
166 transcriptomic analysis (**Table S2**). These data showed that the lack of domains 5 and 6  
167 in S1 influenced the levels of both RyhB sRNA and *sodB* mRNA.

168 It was previously demonstrated that RyhB-dependent *sodB* degradation occurred  
169 in three main steps (**Figure 2B**): (1) formation of sRNA-mRNA binding together with the  
170 protein Hfq, (2) translation inhibition followed by (3) the subsequent rapid degradation  
171 of the sRNA/mRNA duplex by the RNA degradosome (38). Because the rapid depletion of  
172 the mRNA is a consequence of the repression of translation, we analyzed if S1 might be  
173 required for RyhB binding and translation repression. First, we used MS2-sRNA affinity  
174 purification coupled to Northern Blot to probe the interaction between MS2-RyhB and

175 *sodB* mRNA in the WT and mutant *rpsA*Δ56 strains (39) (**Figure 2C**). MS2-RyhB construct  
176 was expressed from a plasmid (pBAD-MS2-RyhB, **Table S4**) *via* arabinose induction in WT  
177 and mutant *rpsA*Δ56, and the crude extract was loaded on an affinity matrix containing  
178 the maltose binding protein fused to MS2 protein. As negative control, untagged RyhB  
179 was expressed in the same conditions from the pBAD-RyhB plasmid (**Table S4**). Northern  
180 Blot experiments were carried out to visualize RyhB and *sodB* in the lysate and eluate  
181 fractions. The data revealed that *sodB* was specifically retained in fractions containing  
182 MS2-RyhB and that the same amount of *sodB* was detected in the WT and *rpsA*Δ56  
183 strains. Western Blot analysis showed that Hfq was also bound to the duplex at a similar  
184 level in WT and *rpsA*Δ56 strains. Overall, these data showed that the formation of base-  
185 pairing interactions between *sodB* and RyhB is not perturbed by the deletion of the C-  
186 terminal domains of S1 *in vivo*.

187 We then assessed the ability of RyhB to repress *sodB* translation in the WT and  
188 mutant strains. A *sodB-lacZ* reporter fusion under the control of the endogenous *sodB*  
189 promoter was integrated into the chromosome of both strains and the activity of β-  
190 galactosidase was measured (**Figure 2D**). The synthesis of RyhB expressed from a  
191 plasmid under the control of an inducible promoter caused a strong decrease of the β-  
192 galactosidase synthesis in both the WT and in the *rpsA*Δ56 strains. We then analyzed the  
193 ability of RyhB to repress the translation of *sodB* using *in vitro* translation assays  
194 supplemented with the ribosomes purified from the WT and *rpsA*Δ56 strains. Ribosomes  
195 from the mutant and parental strains were able to translate *sodB* with the same  
196 efficiency (**Figure S2B**). The incorporation of the S<sup>35</sup>Met showed that the addition of  
197 increasing concentrations of RyhB reduced considerably the synthesis of SodB protein  
198 with the two sets of ribosomes (**Figure S2C**). Finally, toeprinting assays were used to  
199 monitor the effect of RyhB binding on the formation of the ternary initiation complex  
200 involving the 30S ribosomal subunits containing WT S1 or the truncated protein S1Δ56,  
201 the initiator tRNA<sup>Met</sup>, and *sodB* mRNA. We have verified the quality of the 30S  
202 purification using mass spectrometry analysis (results not shown). Formation of the  
203 initiation complex blocks the elongation of a cDNA primer by reverse transcriptase and  
204 induces a signal at position +16 (the A of the initiation codon being the +1, **Figure S2D**).  
205 Binding of RyhB to *sodB* mRNA strongly decreased the formation of the active initiation

206 complex whatever the nature of S1 present on the 30S subunits.

207 Taken together, these data showed that RyhB can repress *sodB* translation with  
208 the same efficiency in the WT and *rpsA*Δ56 strains.

209

### 210 **S1 is required for the rapid RyhB-dependent depletion of *sodB* mRNA**

211 We then assessed whether S1 is involved in RyhB-dependent degradation of *sodB*  
212 mediated by the RNA degradosome. RyhB expression was induced by the addition of  
213 2,2'-dipyridyl during a long period of 25 min, during which levels of *sodB* and RyhB were  
214 evaluated. Northern Blot analysis showed that *sodB* remained detectable for a longer  
215 period in the *rpsA*Δ56 mutant strain than in the WT, indicating that the degradation of  
216 *sodB* occurred with a slower kinetic in the mutant strain due to the absence of domains  
217 5 and 6 of S1 (**Figure 3A**). We then measured the half-life of *sodB* mRNA upon RyhB  
218 expression in both strains by adding rifampicin. The results showed that *sodB* is  
219 degraded over ten-fold faster in the WT strain (less than 1 min) than in the *rpsA*Δ56  
220 mutant strain (11 min) (**Figure 3B**).

221 RyhB induces the rapid degradation of more than 17 mRNAs encoding non-  
222 essential Fe containing proteins such as *sodB*, *fumA*, *sdhCDAB*, *iscA*, and *erpA* (39-44) .  
223 In addition, RyhB activates the translation of *shiA* mRNA by disrupting its inhibitory  
224 secondary structure (45). In order to assess whether the effect of the absence of the  
225 last two domains of S1 on *sodB* can be generalized to other RyhB targets, Northern blot  
226 analysis was performed under conditions where RyhB expression was induced. As  
227 expected, the yields of *sdhC* and *fumA* mRNAs rapidly decreased upon the induction of  
228 RyhB (below 7 min) in the WT strain. Concomitantly, the levels of *shiA* mRNA were  
229 enhanced after 4 min of 2,2'-dipyridyl treatment (**Figure 3C**). The same experiment  
230 performed with the mutant strain showed that the rapid depletion of *sdhC* and *fumA*  
231 was altered in a manner analogous to *sodB*. More surprisingly, *shiA* mRNA was poorly  
232 detectable even after a prolonged expression of RyhB (**Figure 3C**). These data  
233 strongly suggested that the deletion of the last two domains of S1 alters the kinetics  
234 of the turnover of the RyhB-dependent mRNA targets.

235 We then analyzed whether the effect of S1 on mRNA degradation can be  
236 recapitulated *in vitro*. We first purified the ribosomes from the WT and *rpsA*Δ56 mutant



237 strains and confirmed with mass spectrometry that all r-proteins were present in both  
238 ribosome preparations (result not shown). Complex between uniformly radiolabeled  
239 *sodB* mRNA and RyhB was pre-formed. The purified RNA degradosome was added either  
240 to the WT ribosomes (70S WT) containing the full length S1, to the WT ribosomes from  
241 which S1 was removed before the experiment (70S WT -S1), or to the *rpsA*Δ56  
242 ribosomes (70S Δ56). Quantification of the full-length *sodB* mRNA at different time  
243 points showed that its degradation was reproducibly slower in the presence of  
244 ribosomes purified from *rpsA*Δ56 mutant strain than with the WT ribosomes (**Figures 4A**  
245 **and S3A**). Surprisingly, WT ribosomes depleted of S1 behaves as the WT ribosome  
246 containing S1, and the addition of purified S1 and S1Δ56 proteins in the absence of  
247 ribosomes had no major effect on the activity of the RNA degradosome on *sodB* mRNA  
248 *in vitro* (**Figure S3B**). Hence, these data suggest that the mutant 70S Δ56 ribosomes  
249 might be responsible for the *in vitro* slower degradation of *sodB*.

250

251

#### 252 **Deletion of the C-terminal domains of r-protein S1 impacts 16S rRNA maturation.**

253 The activity of the components of the RNA degradosome, and especially RNase E  
254 and PNPase, are not restricted to mRNA degradation. They are important players in other  
255 pathways such as rRNA maturation (46). Given that the mutant strain harbored a cold-  
256 sensitive phenotype, and that 70S purified from this strain affected the *in vitro* kinetics of  
257 *sodB* degradation by the degradosome, we investigated whether the absence of the last  
258 two domains of S1 might perturb the RNA degradosome activity in rRNA biogenesis.

259 A significant amount of 17S rRNA precursor was found in *rpsA*Δ56 mutant strain  
260 using total RNA prepared from rifampicin treated cultures and visualized on ethidium  
261 bromide stained agarose gel (**Figure S3C**). Similar data were observed using Northern Blot  
262 analyzed with a specific oligonucleotide probe complementary to the 5' end of 16S rRNA  
263 region, which is normally cleaved by RNase E (**Figure 4B**). The results showed that the  
264 precursor is observed during a longer time period in the *rpsA*Δ56 strain ( $\geq 15$  min) than in  
265 the WT strain ( $< 2$  min), suggesting that the 17S precursor is processed more slowly in the  
266 absence of the last two C-terminal domains of S1. We then performed sequencing on RNA  
267 samples prepared from polysome preparation purified from the WT and *rpsA*Δ56 mutant

268 strains. In agreement with the previous data, accumulation of reads was observed  
269 upstream of 16S gene only in the mutant strain. Interestingly, analysis of the 5S rRNA  
270 locus, which is matured from the 9S transcript by RNase E (47), did not show any  
271 accumulation of reads in the mutant strain (**Figure 4C**).

272 These data suggested that fast kinetics of the 5' end of 16S rRNA processing  
273 mediated by the RNA degradosome requires the full-length r-protein S1.

274

## 275 **Discussion**

276

277 The present study highlights unexpected features of r-protein S1 in sRNA  
278 regulation and rRNA maturation. First, we have demonstrated that the deletion of the last  
279 two C-terminal domains of S1 impairs cell motility and causes stress responses. This is  
280 accompanied by the deregulation of several genes including many sRNAs. Second, we  
281 showed that these domains on S1 are required for the rapid depletion of RyhB-dependent  
282 repressed mRNAs. Third, we demonstrated that the full-length S1 is required for normal  
283 16S rRNA maturation.

284 The major functions of S1 are linked to the ribosome where the protein  
285 occupies a strategic position at the junction of the platform and the body of the 30S  
286 subunit at the solvent side close to S2 r-protein (32). Its six OB fold RNA binding  
287 domains confer to S1 the ability to recognize many mRNA substrates and to capture  
288 them at unpaired AU-rich sequences, primarily located upstream the SD sequence. S1  
289 is essential for the recruitment and accommodation of mRNAs characterized by  
290 structured elements within the ribosome binding sites, and which contain a weak SD  
291 sequence (7, 48, 49). Thanks to its RNA chaperone activity, the protein remodels  
292 structured RNA elements in a step-wise manner to shift the structured mRNAs from a  
293 stand-by position to its accommodation into the decoding center (7, 49, 50). Besides  
294 this essential role in translation initiation, *E. coli* r-protein S1 can also act without the  
295 ribosome, free or in complex with other proteins, (1) to regulate the translation of  
296 specific mRNAs, (2) to protect mRNAs against the degradation by RNase E and the RNA  
297 degradosome, and (3) to provide additional RNA binding capacity to other protein  
298 partners (reviewed in (34)). Finally, many translational repressors (protein or  
299 sRNA) target directly the S1 functioning on the ribosome to prevent the  
300 formation of the initiation complex (7, 48, 49).

301 *E. coli* cold-sensitive phenotype, as the one observed for *rpsA* $\Delta$ 56 mutant strain,  
302 has been previously associated with ribosome maturation defects (51). This phenotype  
303 was for instance observed for several deletion mutants of ribosome biogenesis factors  
304 (52-54) and more recently for the deletion mutant of the RNA chaperone protein Hfq  
305 (55). We showed here that the deletion of the last two C-terminal domains of the r-  
306 protein S1 affected the kinetics of the maturation of the 5' end of 16S rRNA, which is  
307 performed by RNase E. Ribosomal protein S1 is the last protein incorporated into the  
308 ribosome, concomitant with the maturation of 17S into 16S rRNA, which occurs as the  
309 latest event of rRNA biogenesis. Due to its RNA chaperone activity, the protein might be  
310 required to modify the 17S rRNA structure that could otherwise slow down the RNase E  
311 accessibility and activity (**Figure 5A, upper panel**). Due to its localization close to the exit  
312 site of the 30S subunit, it is tempting to propose that the six OB-fold domains are  
313 necessary to reach the 5' end of the 16S rRNA. In other words, S1 $\Delta$ 56 would be too short  
314 to attain the maturation site. Ribosome biogenesis is a complex process that occurs co-  
315 translationally and involves numerous factors in a well-defined orchestrated scenario  
316 where S1 would contribute to the efficient and complete biogenesis of the ribosome.  
317 Interestingly, such a role of S1 in the regulation of ribosomal biosynthesis has been  
318 proposed in *Shewanella oneidensis*, a  $\gamma$ -proteobacterium where the 6 OB-fold domains  
319 of S1 are similar to *E. coli* (56).

320 The deletion of the S1 C-terminal domains surprisingly causes a significant increase  
321 in the steady-state levels of many sRNAs, and especially RyhB. We showed that in  
322 *rpsA* $\Delta$ 56, many mRNAs that belong to RyhB regulon remained more stable over time  
323 when the expression of RyhB is induced under iron depletion. Our data implies a  
324 functional link between S1 and the RNA degradosome as the protein enhanced the  
325 kinetics of RNA degradation. The degradation of *sodB* mRNA has been extensively studied  
326 in *E. coli* in absence and presence of RyhB (37, 38, 41, 57, 58). The decay depends on the  
327 RNA degradosome machinery, which comprises the single-strand specific RNase E, the 3'-  
328 5' exoribonuclease PNPase, the RNA helicase RhlB and the enolase (reviewed in (59)).  
329 Degradation of mRNA in *E. coli* is often initiated by RNase E and subsequently followed by  
330 the attack of several exoribonucleases and oligoribonucleases to complete the  
331 degradation (60). Lifetimes of *E. coli* mRNAs can differ greatly since reported half-lives

332 range from less than 1 min to 15 min or more (61, 62). Furthermore, mRNA lifetimes can  
333 be regulated in a translation-independent manner by binding of *trans*-acting regulatory  
334 factors such as sRNAs or RNA-binding proteins that impede or enhance RNase E cleavage  
335 (63-66). Together, these observations suggest that mRNA turnover is determined not by  
336 the number of cleavage sites but, rather, by the ease with which RNase E can gain access  
337 to them and the kinetics with which it cleaves. Interestingly, the association between the  
338 RNA degradosome and S1 (together with Rho) was observed in *Caulobacter crescentus*  
339 (which has S1 with 6 OB-fold domains) at low temperature (67). Moreover, in *Salmonella*  
340 *typhimurium*, a loss-of-function mutation in r-protein S1 lacking domain 6, was identified  
341 as a suppressor for a RNase E temperature-sensitive (TS) mutation that affects its mRNA  
342 turnover ability (68). The S1 $\Delta$ 6 and the RNase E TS mutant strains have complementary  
343 phenotypes since RNase E TS mutant is heat sensitive, while S1 $\Delta$ 6 is cold sensitive.  
344 Furthermore, RNase E TS mutant decreases general mRNA half-lives and this phenotype is  
345 restored in the double mutant. In other words, it is possible that the C-terminus of S1  
346 could directly influence the kinetics of RNA target cleavage by RNase E (**Figure 5B**). We  
347 propose that S1 could have two roles: (1) to prepare the mRNA site for optimal cleavage  
348 through its RNA unwinding capacity, acting either on or outside the ribosome; and/or (2)  
349 to facilitate the recruitment or recycling of the RNA degradosome, since S1 is able to bind  
350 both to RNase E and PNPase (69). Even though we favor a direct role of S1 in mRNA  
351 decay, we cannot rule out that its action on the rapid depletion of mRNAs repressed  
352 by RyhB would result from an indirect effect. Indeed, *in vitro* degradation of *sodB*  
353 mRNA was slower with the immature ribosomes isolated from *rpsA* $\Delta$ 56 strain  
354 than the fully matured ribosomes isolated from WT strain containing full length  
355 S1 or from which S1 was removed, while the isolated proteins show no effect.  
356 Hence, we speculate that the RNase E would be stably associated with the  
357 unprocessed ribosomes prepared from *rpsA* $\Delta$ 56 mutant strain. The lack of free  
358 RNase E might in turn induce slower degradation of *sodB* mRNA in presence of  
359 RyhB (**Figure 5A, lower panel**).

360 Another unexpected result was the fact that the RyhB-mediated activation of  
361 *shiA* mRNA was strongly affected in the mutant *rpsA* $\Delta$ 56 strain. It was previously  
362 shown that RyhB acts together with Hfq to favor the recruitment of the ribosome and  
363 the formation of the initiation complex, which in turn stabilizes the mRNA. In addition,

364 the secondary structure of *shiA* mRNA revealed an unpaired AU-rich sequence upstream  
365 the SD sequence (45), which is an appropriate binding site for S1 (34) and for a  
366 ribosome standby site (70). In such a model, the ribosome in standby would easily  
367 relocate to form a productive complex as soon as the RBS become accessible (**Figure**  
368 **5C**). Because S1 has unwinding properties, it would help to prepare the binding site  
369 for RyhB. Together with Hfq, RyhB would strongly stabilize the open form of the  
370 RBS for efficient translation and as the consequence the mRNA would be stabilized.

371 Another major phenotype that we have identified is a strong defect of motility  
372 of the mutant strain, as reflected by the repression of the synthesis of *FliC* (**Figure 1A**).  
373 This result could also be explained by the involvement of S1 in mRNA decay. Indeed, *fliC*  
374 belongs to the motility cascade activated by FlhDC (71), which is itself protected from  
375 degradation by CsrA (72). The activity of CsrA is modulated by CsrB sRNA, that is able  
376 to sequester this RNA-binding protein (73). According to the transcriptomic data, CsrB  
377 expression is higher in the mutant *rpsAΔ56* strain. As the consequence, the levels of  
378 *flhDC* mRNA drops and the expression of *FliC* is subsequently decreased (for a review,  
379 (74). In addition, CsrD is responsible for modulating CsrB level in the cell by promoting  
380 its degradation (75), and this decay requires an additional factor.

381 The affinity of r-protein S1 for unpaired AU-rich sequences, its ability to melt weak  
382 secondary structure elements, and the existence of 6 OB-fold domains endow the protein  
383 with the ability to adapt its mechanism of action according to the RNA and/or protein  
384 substrates, generating a panel of cellular functions. Our work highlights a new function of  
385 S1 in sRNA-dependent regulation and in rRNA maturation showing that in  
386 *Enterobacteriaceae*, S1 is at the crossroad of many functions, all linked to RNA  
387 metabolism. Whether these functions are conserved in bacteria carrying a shorter version  
388 of S1 remained to be studied.

389

### 390 **Acknowledgements**

391 We are thankful to Philippe Hammann and Johanna Chicher for the help in the  
392 proteomic analysis, to Béatrice Chane-Woon-Ming for the R script used to generate the  
393 volcano plots and to Isabelle Caldelari and David Lalaouna for fruitful discussions. This  
394 work was supported by the Centre National de la Recherche Scientifique (CNRS; PR), by

395 the French National Research Agency ANR (ANR-16-CE11-0007-01 to [P.R.]). This work of  
396 the Interdisciplinary Thematic Institute IMCBio, as part of the ITI 2021-2028 program of  
397 the University of Strasbourg, CNRS and Inserm, was supported by IdEx Unistra (ANR-10-  
398 IDEX-0002) and by SFRI-STRAT'US project (20-SFRI-0012), and EUR IMCBio (IMCBio ANR-  
399 17-EURE-0023) under the framework of the French Investments for the Future Program.  
400 Work in the Massé lab has been supported by an operating grant from the Canadian  
401 Institutes of Health Research (CIHR) to EM. BFL and KJB were supported by a Wellcome  
402 Trust Investigator award (200873/Z/16/Z). Mass spectrometry instrumentation was  
403 funded by the University of Strasbourg, IdEx Equipement mi-lourd 2015 and labEx  
404 NetRNA [ANR-10-LABX-0036].

## Material & Methods

### Strains, plasmids and oligonucleotides

All strains and plasmids, which were constructed and used in this study, are described in Supplementary Information. The oligonucleotides sequences are given in Supplementary Information. The *lacZ* fusion described in **Figure 2D** has been performed as previously described (38) in the WT and *rpsA*Δ56 context.

### Proteomics analysis

Protein extraction has been performed on bacteria *rpsA1*, Δ6 or Δ56 grown in LB at 37°C under constant agitation until OD<sub>600</sub> = 0,4. Label free spectral count analysis was performed in triplicate using nanoLC–MS/MS. Protein samples were precipitated with 0.1 M ammonium acetate in 100% methanol and the protein pellets were further digested with sequencing-grade trypsin (Promega). For the analysis involving the *rpsA*Δ6 mutant missing the last C-terminal OB fold domain of protein S1, the samples were analyzed on a TripleTOF5600 mass spectrometer coupled to an NanoLC-2DPlus ChIP system (Sciex). For the analysis involving the *rpsA*Δ56 mutant missing the last two C-terminal OB fold domains of protein S1, the samples were analyzed on a QExactivePlus mass spectrometer coupled to an EASY-nanoLC-1000 (Thermo-Fisher Scientific). Data were searched against the *E.coli* updated UniProtKB database (release 2020\_05) with a decoy strategy. Peptides were identified with Mascot algorithm (version 2.6, Matrix Science, London, UK) and then imported into Proline 2.0 software (<http://proline.profi-proteomics.fr/>). Proteins were validated with Mascot pretty rank equal to 1, and 1% FDR on both peptide spectrum matches (PSM score) and protein sets (Protein Set score). The total number of MS/MS fragmentation spectra was used to relatively quantify each protein between the WT and mutant conditions performed in three independent biological replicates. The statistical analysis based on spectral counts was performed using a homemade R package (IPinquiry4 under <https://github.com/>) using the quasi-likelihood negative binomial model from edgeR (R v3.5.0). For each identified protein, an adjusted p-value corrected by Benjamini-Hochberg was calculated, as well as a protein fold-change (FC) (**Table S1**). The results are presented in a Volcano

plot using protein log<sub>2</sub> fold-changes and their corresponding adjusted log<sub>10</sub>P-values to highlight enriched proteins in both conditions (**Figure 1A** and **Figure S1C**). The mass spectrometric data were deposited to the ProteomeXchange Consortium via the PRIDE partner repository with the dataset identifier PXD023838.

### **Preparation of RNAs**

The bacteria were grown in LB at 37°C under constant agitation until DO<sub>600</sub> = 0,4. When necessary, the 2,2'-dipyridyl was added at 250 µM (point referred at t=0 min) and when necessary FeSO<sub>4</sub> 100 µM at t=5 min. Rifampicin was added at a final concentration of (300 µg/ml). Bacteria are harvested at different time points, pelleted and frozen at -80°C. The genome of the bacteria is checked by PCR using AK68 and KAV04 primers. RNAs were extracted according to the FastRNA Pro protocol (Qbiogene). RNA preparation for transcriptomics analysis was performed in biological duplicates.

### **Transcriptomics analysis**

RNA samples (1 µg) from biological duplicates of WT and *rpsA*Δ56 cultures were ribo-depleted (Ribo-Zero rRNA Removal Kit (Bacteria) Illumina) and cDNA libraries were prepared using the adapter ligation strategy by Vertis NGS service (Germany). RNA samples were fragmented with ultrasound (4 pulses of 30 sec at 4°C) followed by a treatment with antarctic phosphatase and re-phosphorylated with polynucleotide kinase (PNK). Afterwards, oligonucleotide adapters were ligated to the 5' and 3' ends. First-strand cDNA synthesis was performed using M-MLV reverse transcriptase and the 3' adapter as primer. The resulting cDNAs were amplified with PCR using a high fidelity DNA polymerase. The primers used for PCR amplification were designed for TruSeq sequencing according to the instructions of Illumina. The cDNA was purified using the Agencourt AMPure XP kit (Beckman Coulter Genomics). The cDNAs have a size range of 200-500 bp. The libraries were either paired-end sequenced using 2x75 bp read length (Replica R2 samples) or single-end sequenced using 50 bp read length (Replica 1 samples) on an NextSeq 500 system (Illumina). RNA-seq analysis was performed according to (76). Reads were processed and aligned on *E. coli* genome (NCBI RefSeq Accession NC\_000913.3) using the Galaxy platform (77). We used DESeq2 to estimate enrichment values (P-value <



0.05; Fold change (FC) > 2) (**Table S2**). Transcriptomics data are available in the GEO database with the accession code GSE166046.

### **Northern Blot**

After separation on agarose gels (1-2 %) containing 20 mM guanidine thiocyanate or on 8 % polyacrylamide- 7 M urea gels, 20 µg or 5-10 µg of total RNA, respectively, was transferred onto Hybond-N+ or Hybond-XL membranes (Amersham Bioscience). Cross-linking was performed by UV (1200 J). For detection of transcripts, DIG-labeled RNA probes (prepared according to the protocol provided by Roche, Cat. No. 11 277 073 910) or radiolabeled DNA probes and RNA probes were used (**Table S5**). Each experiment was reproduced at least three times. For the determination of the half-lives of *sodB* mRNA in the two strains, quantification of the remaining mRNA at the different time points was done by ImageQuant TL software (GE Healthcare Life Sciences).

### **Proteins extraction and Western Blot analysis**

Protein extraction was performed using the following protocol. Cold TCA solution was added to cells (5% final concentration) and the mixture was placed on ice for 10 min. After precipitation (15,000 g, 10 min), the protein precipitate was washed with 80% acetone (twice). Western blot analysis was performed as previously reported (78). Proteins were resuspended in protein-loading gel electrophoresis buffer, followed by separation on SDS-PAGE gel and transfer to nitrocellulose membrane. Mouse monoclonal ANTI-FLAG® M2 antibody (Sigma) was used at a dilution of 1:1,000. IRDye 800CW-conjugated goat anti-rabbit secondary antibody (Li-Cor Biosciences, Lincoln, NE, USA) was used at a dilution of 1:15,000. Western blots were revealed on an Odyssey infrared imaging system (Li-Cor Biosciences), and quantification was performed using the Odyssey 3.0 software.

### **β-galactosidase assays**

Kinetics assays for β-galactosidase activity were performed as described previously using a SpectraMax 250 microtitre-plate reader (Molecular Devices, Sunnyvale, CA, USA) (45). Briefly, overnight bacterial culture incubated at 37°C were diluted 1,000-fold in 50 ml of fresh LB medium and grown with agitation (220 rpm) at 37°C. When required, expression

of respective sRNAs was induced by addition of 0.1% arabinose at  $OD_{600nm} = 0.1$ . Specific  $\beta$ -galactosidase activities were calculated using the formula  $V_{max}/OD_{600nm}$  when cells reached an  $OD_{600nm} = 0.5 - 0.8$  (exponential phase of growth). Data represent the mean of three independent experiments ( $\pm$  standard deviation, SD).

### **Ribosome purification and Toeprinting**

The preparation of the *E. coli* 70S, 30S subunits, and toeprints were performed as previously described (79) (see Supplementary Information). Toeprint was done on *sodB* 119 mRNA using fluorescently labeled *sodB*rev2 primer. After primer extension with reverse transcriptase, the cDNA products were analyzed by capillary electrophoresis (3130x Genetic analyzer Applied Biosystems) and data processed using QuShape software (80). For experimental details, see the supplementary materials.

### ***In vitro* translation assays**

The PURExpress  $\Delta$ Ribosome (NEB #E3313) kit was used according to the commercial protocol in the presence of Met-S<sup>35</sup> (<https://www.neb.com/~media/Catalog/All-Products/OD1F4E4BB3F14EFC9DF22C6463654CE4/Datacards%20or%20Manuals/manualE6800.pdf>). The reaction mix has been reduced to 10  $\mu$ L, *sodB*-FL mRNA was used at 0,4  $\mu$ M (1  $\mu$ g) in the presence of ribosomes 70S purified from *rpsA1* or *rpsA* $\Delta$ 56 strains at 2,4  $\mu$ M, with increasing concentration of RyhB (2 and 4  $\mu$ M). The reaction is incubated 2h at 37°C, loaded on a 15% SDS-PAGE colored with Coomassie blue and revealed by autoradiography. A specific band at the bottom of the gel was used to normalize the signal.

### **Analysis of RNA-RNA binding *in vivo***

Affinity purification assays were performed as described in (78). The *E. coli* bacterial strains (WT and *rpsA* $\Delta$ 56 strains) were grown to an  $OD_{600nm}$  of 0.4, at which point 0.1% arabinose was added to induce the expression of MS2-RyhB or RyhB during 10 min. Cells equivalent to 40  $OD_{600nm}$  were chilled for 10 min on ice. RNAs were extracted following the hot-phenol protocol from 600  $\mu$ L of culture (input). The remaining cells were then centrifuged, resuspended in 1mL of buffer A (20 mM Tris-HCl at pH 8.0, 150 mM KCl, 5

mM MgCl<sub>2</sub>, 1 mM DTT), and centrifuged again. Cells were resuspended in 2 mL of buffer A and lysed using a French Press (430 psi, three times). Lysate was then cleared by centrifugation (17,000 g, 30 min, 4°C). The soluble fraction was subjected to affinity chromatography at 4°C composed of 75 µL of amylose resin bound to 200 pmol of MS2-MBP protein in a Bio-Spin disposable chromatography columns (Bio-Rad). After washing, the cleared lysate was loaded onto the column, and washed with 5 mL of buffer A. RNA and proteins were eluted from the column with 1 mL of buffer A containing 15 mM maltose. Eluted RNA was extracted with phenol-chloroform, followed by ethanol (3 vol) precipitation of the aqueous phase in the presence of 20 mg of glycogen. For protein isolation, the organic phase was subjected to acetone precipitation. RNA samples were then analyzed by Northern blot and protein samples by Western blot.

### **Motility track/soft agar**

An overnight culture of the different strains was grown in LB at 37°C upon constant agitation and used the next day to inoculate a fresh day culture in LB at 37°C upon constant agitation to reach an OD<sub>600nm</sub> = 0.4. Then, 2µL of culture was dropped onto a soft agar petri dish (tryptone 13 g/L, NaCl 7 g/L, agar-agar 0.3%) and grown overnight at 37°C. For motility tracking, the day culture was inspected between slide and slip cover using an optical microscope, and movies were acquired. These videos were processed using imageJ using mtrack2 plugin (1 out of 50 frames).

### **Degradosome purification**

The recombinant RNA degradosome was purified from *E. coli* as described in (81).

### ***In vitro* kinetics of *sodB* degradation in presence of ribosomes and RyhB**

The degradation *sodB* was monitored *in vitro* using the purified RNA degradosome under various conditions and as a function of time. The reactions were performed at 37°C from 5 to 20 min in a final volume of 6 µl containing the Degradosome Buffer (Tris HCl pH 7.5 25 mM, NH<sub>4</sub>Cl 50 mM, DTT 1 mM, KCl 50 mM, MgCl<sub>2</sub> 10 mM, RNasine (Promega) 1 U/µl), the uniformly radiolabeled *sodB* mRNA (300 nM) free or bound to RyhB sRNA (2 µM), *E.*

*coli* ribosomes (500 nM), *E. coli* initiator tRNA (Sigma; 2  $\mu$ M) and the purified RNA degradosome (40 nM). In other experiments, the ribosomes were substituted by the purified proteins WT S1 or  $\Delta$ 56 (500 nM) (see Supplementary Information <sup>6</sup>). The reactions were stopped by adding to 5  $\mu$ l of reaction 5  $\mu$ l of Stop Solution (Tris HCl pH 7.5 100 mM, EDTA 12.5 mM, NaCl 150 mM, SDS 1%, Proteinase K (Sigma) 2 mg/ml) and incubated 30 min at 46°C. Then, 6  $\mu$ l of Urea Loading Buffer (urea 7 M, xylene cyanol 0.025 %, bromophenol blue 0.025 %) was added and the RNA fragments were fractionated on a polyacrylamide 8% (1/20)- urea 7M gel electrophoresis. Quantification of the full length mRNA was done by ImageQuant TL software (GE Healthcare Life Sciences).

## 1   **References**

- 2
- 3   1.    Duval M, Simonetti A, Caldelari I, Marzi S. 2015. Multiple ways to regulate translation  
4       initiation in bacteria: Mechanisms, regulatory circuits, dynamics. *Biochimie*  
5       doi:10.1016/j.biochi.2015.03.007:18-29.
- 6   2.    Gold L. 1988. Posttranscription regulatory mechanisms in *Escherichia Coli*. *Regulation*:199-  
7       233.
- 8   3.    Kennell D, Riezman H. 1977. Transcription and translation initiation frequencies of the  
9       *Escherichia coli* lac operon. *Journal of Molecular Biology* 114:1-21.
- 10  4.    Lovmar M, Ehrenberg M. 2006. Rate, accuracy and cost of ribosomes in bacterial cells.  
11       *Biochimie* 88:951-961.
- 12  5.    Milón P, Maracci C, Filonava L, Gualerzi CO, Rodnina VM. 2012. Real-time assembly  
13       landscape of bacterial 30S translation initiation complex. *Nature Structural & Molecular*  
14       *Biology* 19:609-615.
- 15  6.    Sørensen Ma, Fricke J, Pedersen S. 1998. Ribosomal protein S1 is required for translation  
16       of most, if not all, natural mRNAs in *Escherichia coli* in vivo. *Journal of molecular biology*  
17       280:561-569.
- 18  7.    Duval M, Korepanov A, Fuchsbauer O, Fechter P, Haller A, Fabbretti A, Choulier L, Micura  
19       R, Klaholz BP, Romby P, Springer M, Marzi S. 2013. *Escherichia coli* Ribosomal Protein S1  
20       Unfolds Structured mRNAs Onto the Ribosome for Active Translation Initiation. *PLoS*  
21       *Biology* 11:1-15.
- 22  8.    Boni VI, Isaeva DM, Musychenko ML, Tzareva VN. 1990. Ribosome-messenger recognition:  
23       mRNA target sites for ribosomal protein S1. *Nucleic acids research* 19:155-162.
- 24  9.    Farwell Ma, Roberts MW, Rabinowitz JC. 1992. The effect of ribosomal protein S1 from  
25       *Escherichia coli* and *Micrococcus luteus* on protein synthesis in vitro by *E. coli* and *Bacillus*  
26       *subtilis*. *Molecular microbiology* 6:3375-3383.
- 27  10.   Komarova VA, Tchufistova LS, Boni VI, Dreyfus M. 2005. AU-Rich Sequences within 5 '  
28       Untranslated Leaders Enhance Translation and Stabilize mRNA in *Escherichia coli*.  
29       187:1344-1349.
- 30  11.   Tzareva B VN. 1994. Ribosome-messenger recognition in the absence of the Shine-  
31       Dalgarno interactions. *FEBS Letters* 337:189-194.
- 32  12.   Bear DG, Ng R, Van Derveer D, Johnson NP, Thomas G, Schleich T, Noller HF. 1976.  
33       Alteration of polynucleotide secondary structure by ribosomal protein S1. *Proceedings of*  
34       *the National Academy of Sciences of the United States of America* 73:1824-1828.
- 35  13.   Kolb a, Hermoso JM, Thomas JO, Szer W. 1977. Nucleic acid helix-unwinding properties of  
36       ribosomal protein S1 and the role of S1 in mRNA binding to ribosomes. *Proceedings of the*  
37       *National Academy of Sciences of the United States of America* 74:2379-2383.
- 38  14.   Qu X, Lancaster L, Noller HF, Bustamante C, Tinoco I. 2012. Ribosomal protein S1 unwinds  
39       double-stranded RNA in multiple steps. *Proceedings of the National Academy of Sciences*  
40       109:14458-14463.
- 41  15.   Rajkowitsch L, Schroeder R. 2007. Dissecting RNA chaperone activity. *RNA (New York, NY)*  
42       13:2053-2060.
- 43  16.   Thomas JO, Kolb a, Szer W. 1978. Structure of single-stranded nucleic acids in the  
44       presence of ribosomal protein S1. *Journal of molecular biology* 123:163-176.
- 45  17.   Sukhodolets MV, Garges S, Adhya S. 2006. Ribosomal protein S1 promotes transcriptional  
46       cycling. *RNA* 12:1505-1513.
- 47  18.   McGinness KE, Sauer RT. 2004. Ribosomal protein S1 binds mRNA and tmRNA similarly but  
48       plays distinct roles in translation of these molecules. *Proceedings of the National*  
49       *Academy of Sciences of the United States of America* 101:13454-13459.
- 50  19.   Okada T, Wower IK, Wower J, Zwieb CW, Kimura M. 2004. Contribution of the second OB  
51       fold of ribosomal protein S1 from *Escherichia coli* to the recognition of TmRNA.

- 52 Bioscience, biotechnology, and biochemistry 68:2319-2325.
- 53 20. Saguy M, Gillet R, Skorski P, Hermann-Le Denmat S, Felden B. 2007. Ribosomal protein S1  
54 influences trans-translation in vitro and in vivo. *Nucleic Acids Research* 35:2368-2376.
- 55 21. Wower IK, Zwieb CW, Guven Sa, Wower J. 2000. Binding and cross-linking of tmRNA to  
56 ribosomal protein S1, on and off the Escherichia coli ribosome. *The EMBO journal*  
57 19:6612-6621.
- 58 22. Boni VI, Artamonova VS, Dreyfus M. 2000. The last RNA-binding repeat of the Escherichia  
59 coli ribosomal protein S1 is specifically involved in autogenous control. *Journal of*  
60 *Bacteriology* 182:5872-5879.
- 61 23. Aseev VL, Levandovskaya Aa, Tchufistova LS. 2008. A new regulatory circuit in ribosomal  
62 protein operons : S2-mediated control of the rpsB-tsF expression in vivo A new regulatory  
63 circuit in ribosomal protein operons : S2-mediated control of the rpsB-tsF expression in  
64 vivo. doi:10.1261/rna.1099108.rRNA:1882-1894.
- 65 24. Briani F, Curti S, Rossi F, Carzaniga T, Mauri P, Dehò G. 2008. Polynucleotide  
66 phosphorylase hinders mRNA degradation upon ribosomal protein S1 overexpression in  
67 Escherichia coli. *RNA (New York, NY)* 14:2417-2429.
- 68 25. Delvillani F, Papiani G, Deho G, Briani F. 2011. S1 ribosomal protein and the interplay  
69 between translation and mRNA decay. *Nucleic Acids Res* 39:7702-15.
- 70 26. Bisaglia M, Laalami S, Uzan M, Bontems F. 2003. Activation of the RegB endoribonuclease  
71 by the S1 ribosomal protein is due to cooperation between the S1 four C-terminal  
72 modules in a substrate-dependant manner. *Journal of Biological Chemistry* 278:15261-  
73 15271.
- 74 27. Miranda G, Schuppli D, Barrera I, Hausherr C, Sogo JM, Weber H. 1997. Recognition of  
75 bacteriophage Qbeta plus strand RNA as a template by Qbeta replicase: role of RNA  
76 interactions mediated by ribosomal proteins S1 and host factor. *Journal of molecular*  
77 *biology* 267:1089-1103.
- 78 28. Takeshita D, Yamashita S, Tomita K. 2014. Molecular insights into replication initiation by  
79 Q replicase using ribosomal protein S1. *Nucleic Acids Research* 42:10809-10822.
- 80 29. Tomita K. 2014. Structures and Functions of Q $\beta$  Replicase: Translation Factors beyond  
81 Protein Synthesis. *International Journal of Molecular Sciences* 15:15552-15570.
- 82 30. Vasilyev NN, Kutlubaeva ZS, Ugarov VI, Chetverina VH, Chetverin AB. 2013. Ribosomal  
83 protein S1 functions as a termination factor in RNA synthesis by Q $\beta$  phage replicase.  
84 *Nature communications* 4:1781.
- 85 31. Salah P, Bisaglia M, Aliprandi P, Uzan M, Sizun C, Bontems F. 2009. Probing the  
86 relationship between gram-negative and gram-positive S1 proteins by sequence analysis.  
87 *Nucleic Acids Research* 37:5578-5588.
- 88 32. Byrgazov K, Grishkovskaya I, Arenz S, Coudevylle N, Temmel H, Wilson DN, Djinovic-  
89 Carugo K, Moll I. 2015. Structural basis for the interaction of protein S1 with the  
90 Escherichia coli ribosome. *Nucleic Acids Research* 43:661-673.
- 91 33. Giraud P, Créchet J-B, Uzan M, Bontems F, Sizun C. 2014. Resonance assignment of the  
92 ribosome binding domain of E. coli ribosomal protein S1. *Biomolecular NMR Assignments*  
93 9:107-111.
- 94 34. Hajnsdorf E, Boni IV. 2012. Multiple activities of RNA-binding proteins S1 and Hfq.  
95 *Biochimie* 94:1544-1553.
- 96 35. Loveland AB, Korostelev AA. 2018. Structural dynamics of protein S1 on the 70S ribosome  
97 visualized by ensemble cryo-EM. *Methods* 137:55-66.
- 98 36. Skorski P, Proux F, Cheraiti C, Dreyfus M, Hermann-Le Denmat S. 2007. The deleterious  
99 effect of an insertion sequence removing the last twenty percent of the essential  
100 Escherichia coli rpsA gene is due to mRNA destabilization, not protein truncation. *Journal*  
101 *of Bacteriology* 189:6205-6212.
- 102 37. Massé E, Escorcía FE, Gottesman S. 2003. Coupled degradation of a small regulatory RNA  
103 and its mRNA targets in Escherichia coli. *Genes and Development* 17:2374-2383.

- 104 38. Prévost K, Desnoyers G, Jacques JF, Lavoie F, Massé E. 2011. Small RNA-induced mRNA  
105 degradation achieved through both translation block and activated cleavage. *Genes and*  
106 *Development* 25:385-396.
- 107 39. Lalaouna D, Carrier M-C, Semsey S, Brouard J-S, Wang J, Wade Joseph T, Massé E. 2015. A  
108 3' External Transcribed Spacer in a tRNA Transcript Acts as a Sponge for Small RNAs to  
109 Prevent Transcriptional Noise. *Molecular Cell* doi:10.1016/j.molcel.2015.03.013:393-405.
- 110 40. Bos J, Duverger Y, Thouvenot B, Chiaruttini C, Branlant C, Springer M, Charpentier B,  
111 Barras F. 2013. The sRNA RyhB Regulates the Synthesis of the Escherichia coli Methionine  
112 Sulfoxide Reductase MsrB but Not MsrA. *PLoS ONE* 8:1-14.
- 113 41. Massé E, Gottesman S. 2002. A small RNA regulates the expression of genes involved in  
114 iron metabolism in Escherichia coli. *Proceedings of the National Academy of Sciences of*  
115 *the United States of America* 99:4620-4625.
- 116 42. Massé E, Majdalani N, Gottesman S. 2003. Regulatory roles for small RNAs in bacteria.  
117 *Current Opinion in Microbiology* 6:120-124.
- 118 43. Massé E, Vanderpool CK, Gottesman S. 2005. Effect of RyhB small RNA on global iron use  
119 in Escherichia coli. *Journal of Bacteriology* 187:6962-6971.
- 120 44. Wright PR, Richter AS, Papenfort K, Mann M, Vogel J, Hess WR, Backofen R, Georg J. 2013.  
121 Comparative genomics boosts target prediction for bacterial small RNAs. *Proceedings of*  
122 *the National Academy of Sciences* 110:E3487-E3496.
- 123 45. Prévost K, Salvail H, Desnoyers G, Jacques JF, Phaneuf É, Massé E. 2007. The small RNA  
124 RyhB activates the translation of shiA mRNA encoding a permease of shikimate, a  
125 compound involved in siderophore synthesis. *Molecular Microbiology* 64:1260-1273.
- 126 46. Li Z, Pandit S, Deutscher MP. 1999. RNase G (CafA protein) and RNase E are both required  
127 for the 5' maturation of 16S ribosomal RNA. *EMBO J* 18:2878-85.
- 128 47. Ghora BK, Apirion D. 1978. Structural analysis and in vitro processing to p5 rRNA of a 9S  
129 RNA molecule isolated from an rne mutant of E. coli. *Cell* 15:1055-1066.
- 130 48. Azam MS, Vanderpool CK. 2020. Translation inhibition from a distance: The small RNA  
131 SgrS silences a ribosomal protein S1-dependent enhancer. *Molecular Microbiology*  
132 114:391-408.
- 133 49. Romilly C, Deindl S, Wagner GEH. 2019. The ribosomal protein S1-dependent standby site  
134 in tisB mRNA consists of a single-stranded region and a 5' structure element. *Proceedings*  
135 *of the National Academy of Sciences of the United States of America* 116:15901-15906.
- 136 50. Romilly C, Lippegaus A, Wagner EGH. 2020. An RNA pseudoknot is essential for standby-  
137 mediated translation of the tisB toxin mRNA in Escherichia coli. *Nucleic acids research*  
138 48:12336-12347.
- 139 51. Connolly K, Culver G. 2009. Deconstructing ribosome construction. *Trends in Biochemical*  
140 *Sciences* 34:256-263.
- 141 52. Bylund GO, Wipemo LC, Lundberg LAC, Wikström PM. 1998. RimM and RbfA are essential  
142 for efficient processing of 16S rRNA in Escherichia coli. *Journal of Bacteriology* 180:73-82.
- 143 53. Connolly K, Rife JP, Culver G. 2008. Mechanistic insight into the ribosome biogenesis  
144 functions of the ancient protein KsgA. *Molecular Microbiology* 70:1062-1075.
- 145 54. Leong V, Kent M, Jomaa A, Ortega J. 2013. Escherichia coli rimM and yjeQ null strains  
146 accumulate immature 30S subunits of similar structure and protein complement. *Rna*  
147 19:789-802.
- 148 55. Andrade J, dos Santos RF, Chelysheva I, Ignatova Z, Arraiano CM. 2018. The RNA-binding  
149 protein Hfq is important for ribosome biogenesis and affects translation fidelity. *The*  
150 *EMBO Journal* 37:e97631.
- 151 56. Xie P, Wang J, Liang H, Gao H. 2021. Shewanella oneidensis arcA Mutation Impairs Aerobic  
152 Growth Mainly by Compromising Translation. *Life (Basel)* 11.
- 153 57. Kawamoto H, Morita T, Shimizu A, Inada T, Aiba H. 2005. Implication of membrane  
154 localization of target mRNA in the action of a small RNA: Mechanism of post-  
155 transcriptional regulation of glucose transporter in Escherichia coli. *Genes and*

- 156 Development 19:328-338.
- 157 58. Morita T, Maki K, Aiba H. 2005. RNase E-based ribonucleoprotein complexes: Mechanical  
158 basis of mRNA destabilization mediated by bacterial noncoding RNAs. *Genes and*  
159 *Development* 19:2176-2186.
- 160 59. Bandyra KJ, Bouvier M, Carpousis AJ, Luisi BF. 2013. The social fabric of the RNA  
161 degradosome. *Biochimica et Biophysica Acta - Gene Regulatory Mechanisms* 1829:514-  
162 522.
- 163 60. Carpousis AJ. 2007. The RNA degradosome of *Escherichia coli*: an mRNA-degrading  
164 machine assembled on RNase E. *Annu Rev Microbiol* 61:71-87.
- 165 61. Lodato PB, Hsieh PK, Belasco JG, Kaper JB. 2012. The ribosome binding site of a mini-ORF  
166 protects a T3SS mRNA from degradation by RNase E. *Molecular Microbiology* 86:1167-  
167 1182.
- 168 62. Richards J, Luciano DJ, Belasco JG. 2012. Influence of translation on RppH-dependent  
169 mRNA degradation in *Escherichia coli*. *Mol Microbiol* 86:1063-72.
- 170 63. Fröhlich KS, Papenfort K, Fekete A, Vogel J. 2013. A small RNA activates CFA synthase by  
171 isoform-specific mRNA stabilization. *EMBO Journal* 32:2963-2979.
- 172 64. Michaux C, Holmqvist E, Vasicek E, Sharan M, Barquist L, Westermann AJ, Gunn JS, Vogel  
173 J. 2017. RNA target profiles direct the discovery of virulence functions for the cold-shock  
174 proteins CspC and CspE. *Proceedings of the National Academy of Sciences of the United*  
175 *States of America* 114:6824-6829.
- 176 65. Papenfort K, Sun Y, Miyakoshi M, Vanderpool CK, Vogel J. 2013. Small RNA-mediated  
177 activation of sugar phosphatase mRNA regulates glucose homeostasis. *Cell* 153:426-437.
- 178 66. Zhang Y, Burkhardt DH, Rouskin S, Li GW, Weissman JS, Gross CA. 2018. A Stress Response  
179 that Monitors and Regulates mRNA Structure Is Central to Cold Shock Adaptation.  
180 *Molecular Cell* 70:274-286.e7.
- 181 67. Aguirre AA, Vicente AM, Hardwick SW, Alvelos DM, Mazzon RR, Luisi BF, Marques VM.  
182 2017. Association of the cold shock DEAD-box RNA helicase RhIE to the RNA degradosome  
183 in *Caulobacter crescentus*. *Journal of Bacteriology* 199:1-13.
- 184 68. Hammarlöf DL, Bergman JM, Garmendia E, Hughes D. 2015. Turnover of mRNAs is one of  
185 the essential functions of RNase E. *Molecular Microbiology* 98:34-45.
- 186 69. Feng Y, Huang H, Liao J, Cohen SN. 2001. *Escherichia coli* Poly(A)-binding Proteins That  
187 Interact with Components of Degradosomes or Impede RNA Decay Mediated by  
188 Polynucleotide Phosphorylase and RNase E. *Journal of Biological Chemistry* 276:31651-  
189 31656.
- 190 70. Unoson C, Wagner EGH. 2007. Dealing with stable structures at ribosome binding sites:  
191 bacterial translation and ribosome standby. *RNA biology* 4:113-117.
- 192 71. Soutourina OA, Bertin PN. 2003. Regulation cascade of flagellar expression in Gram-  
193 negative bacteria. *FEMS Microbiol Rev* 27:505-23.
- 194 72. Yakhnin A, Baker C, Vakulskas C, Yakhnin H, Berezin I, Romeo T, Babitzke P. 2013. CsrA  
195 activates flhDC expression by protecting flhDC mRNA from RNase E-mediated cleavage.  
196 *Molecular Microbiology* 87:851-866.
- 197 73. Liu MY, Gui G, Wei B, Iii JFP, Oakford L, Giedroc DP, Romeo T. 1997. The RNA Molecule  
198 CsrB Binds to the Global Regulatory Protein CsrA and Antagonizes Its Activity in  
199 *Escherichia coli*. *Journal of Biological Chemistry* 272:17502-17510.
- 200 74. Chilcott GS, Hughes KT. 2000. Coupling of flagellar gene expression to flagellar assembly in  
201 *Salmonella enterica* serovar typhimurium and *Escherichia coli*. *Microbiology and*  
202 *molecular biology reviews* : MMBR 64:694-708.
- 203 75. Suzuki K, Babitzke P, Kushner SR, Romeo T. 2006. Identification of a novel regulatory  
204 protein (CsrD) that targets the global regulatory RNAs CsrB and CsrC for degradation by  
205 RNase E. *Genes and Development* 20:2605-2617.
- 206 76. Bronesky D, Desgranges E, Corvaglia A, François P, Caballero CJ, Prado L, Toledo-Arana A,  
207 Lasa I, Moreau K, Vandenesch F, Marzi S, Romby P, Caldelari I. 2019. A multifaceted small



- 208 RNA modulates gene expression upon glucose limitation in *Staphylococcus aureus*. The  
209 EMBO Journal 38:1-18.
- 210 77. Afgan E, Baker D, van den Beek M, Blankenberg D, Bouvier D, Čech M, Chilton J, Clements  
211 D, Coraor N, Eberhard C, Grüning B, Guerler A, Hillman-Jackson J, Von Kuster G, Rasche E,  
212 Soranzo N, Turaga N, Taylor J, Nekrutenko A, Goecks J. 2016. The Galaxy platform for  
213 accessible, reproducible and collaborative biomedical analyses: 2016 update. *Nucleic  
214 acids research* 44:W3-W10.
- 215 78. Desnoyers G, Massé E. 2012. Noncanonical repression of translation initiation through  
216 small RNA recruitment of the RNA chaperone Hfq. *Genes and Development* 26:726-739.
- 217 79. Fechter P, Chevalier C, Yusupova G, Yusupov M, Romby P, Marzi S. 2009. Ribosomal  
218 Initiation Complexes Probed by Toeprinting and Effect of trans-Acting Translational  
219 Regulators in Bacteria, p 1-18, *Methods in Molecular Biology, Riboswitches*, vol 540.
- 220 80. Karabiber F, McGinnis JL, Favorov VO, Weeks KM. 2013. QuShape: Rapid, accurate, and  
221 best-practices quantification of nucleic acid probing information, resolved by capillary  
222 electrophoresis. *Rna* 19:63-73.
- 223 81. Worrall JA, Górna M, Crump NT, Phillips LG, Tuck AC, Price AJ, Bavro VN, Luisi BF. 2008.  
224 Reconstitution and analysis of the multienzyme *Escherichia coli* RNA degradosome. *J Mol  
225 Biol* 382:870-83.
- 226  
227  
228

229 **Figure Legends**

230

231 **Figure 1: Comparison of gene expression in wild-type (WT) and mutant strains by**

232 **proteomic and RNA-seq analysis.** (A) Comparative proteomic analysis of the proteins

233 expressed in the WT and in the *rpsAΔ56* strain. The threshold was set at an induction

234 fold of 2 (P-value <0.05). Several proteins are colored according to the metabolic and

235 functional pathways to which they belong. (B) Comparative RNA-seq analysis of the RNA

236 expressed in the WT and in the *rpsAΔ56* strain. The threshold was set at an induction

237 fold of 2 (P-value <0.05). The raw data are provided in Table S1 (proteomic analysis WT

238 vs *rpsAΔ56* strains) and Table S2 (RNA-seq analysis WT vs *rpsAΔ56* strains).

239

240 **Figure 2: The deletion of S1 C-terminal domains perturbs RyhB-mediated *sodB***

241 **degradation.** (A) Northern blot analysis was performed using a labeled probe against

242 either *sodB* or RyhB. Total RNA extracts were prepared from WT and *rpsAΔ56* cultures in

243 LB at 37°C. At OD<sub>600</sub>=0.4, 250 μM 2,2'-dipyridyl was added to the culture to induce RyhB.

244 After 5 min, 100 μM of FeSO<sub>4</sub> was added to specifically inhibit RyhB synthesis. The same

245 samples were run on another gel for 5S rRNA (5S) detection, as a loading control. (B)

246 RyhB-mediated *sodB* regulation has been well described, and occurs in three steps: (1)

247 sRNA-mRNA form a complex together with the protein Hfq, (2) RyhB inhibits translation

248 initiation, and induces (3) rapid degradation of the sRNA/mRNA duplex by the RNA

249 degradosome. (C) Northern Blot analysis performed on RNA crude extracts prepared from

250 WT and mutant *rpsAΔ56* strains expressing RyhB fused with the MS2 tag (38) and purified

251 on affinity chromatography. The presence of *sodB* and RyhB was monitored with

252 appropriate labeled probes, and anti-FLAG antibodies were used for Hfq<sup>3xFLAG</sup> Western

253 Blot analysis. The synthesis of MS2-RyhB (+) and RyhB (control) expressed from a pBAD

254 plasmid, was induced by the addition of 0.1 % arabinose in the indicated lanes. (D)

255 Analysis of β-galactosidase synthesis from the *sodB*<sub>430</sub>-*lacZ* translational fusion integrated

256 into the chromosome of the MG1655 (WT) and mutant (*rpsAΔ56*) strains in presence or

257 absence of RyhB. The *lacZ* gene was fused to *sodB* containing 430 nucleotides of its

258 coding region from the AUG including the major RNase E cleavage site. Strains carried

259 either an empty vector (pNM12; black) or a pBAD-*ryhB* (grey). *RyhB* expression was

260 induced by addition of 0.1% arabinose. Signals from each strain were normalized

261 according to the corresponding empty vector. Data are representative of three  
262 independent experiments.

263

264 **Figure 3: The RNA degradosome requires the C-terminal domains of S1 to induce fast**  
265 **RyhB-mediated degradation of *sodB*.** (A) Same legend as in Figure 2A, except that FeSO<sub>4</sub>  
266 was not added to the culture to visualize longer degradation pattern. The results show  
267 that in the absence of the last two domains of S1, *sodB* mRNA is degraded in a much  
268 slower manner in response to RyhB induction than in the WT strain. (B) Measurements of  
269 the half-life of *sodB* mRNA in the WT and *rpsAΔ56* mutant strains. The experiment was  
270 done by adding rifampicin at 2 min (2,2'-dipyridyl induction being the t=0), to block the  
271 transcription and to visualize the degradation of *sodB*. t<sub>1/2</sub> represents the half-life which  
272 was derived after quantification of the autoradiographies. RyhB and 5S were detected  
273 using the same RNA samples, which were run on different gels in parallel. (C) Analysis of  
274 the mRNAs, which belong to the RyhB regulon. Same legend as in Figure 3A.

275

276 **Figure 4: The last two domains of S1 are required for 16S rRNA maturation but not for**  
277 **5S maturation.** (A) *In vitro* reconstitution of *sodB* degradation using the purified RNA  
278 degradosome. Uniformly radiolabeled *sodB* mRNA was incubated in presence of RyhB, the  
279 purified RNA degradosome, and either the WT ribosome containing full length S1, the WT  
280 ribosome from which S1 was removed before the experiment, or the *rpsAΔ56* ribosomes.  
281 The degradation of *sodB* mRNA was followed over time (5, 10, 20 min) and the RNA  
282 fragments were fractionated on an 8% polyacrylamide-7 M urea gel electrophoresis. The  
283 signals for the remaining full length *sodB* mRNA were quantified with ImageQuant TL  
284 software (GE Healthcare Life Sciences) on three independent experiments to calculate the  
285 error bars. (B) Measurements of the half-life of the 17S rRNA precursor using Northern  
286 Blot analysis. Total RNA was extracted from the WT and mutant *rpsAΔ56* strains at various  
287 time points after addition of rifampicin. A specific probe revealed the 5' region of the 17S.  
288 (C) IGV visualization of the rRNA reads obtained by ribosome profiling performed in WT  
289 and *rpsAΔ56* strains. Accumulation of reads corresponding to 5' leader of 17S precursor is  
290 observed in the mutant strain. We showed the data on *rrsH* gene as representative of the  
291 7 rRNA operons. In comparison, reads aligned to the 5S precursor region (9S) are shown  
292 (*rrfH* gene).

293

294 **Figure 5: Possible models for S1 action.** (A) Model for an indirect effect of S1 on *sodB*  
295 degradation. (left) S1 enhances the kinetics of 17S rRNA maturation. In WT strain, RyhB-  
296 dependent degradation of *sodB* is efficient. In the mutant *rpsAΔ56* strain, the 17S is not  
297 efficiently matured, and it is proposed that RNase E might remain associated for a longer  
298 time with the 17S to cleave it. As the results, the kinetics of the degradation of *sodB*  
299 mRNA is altered. (B) Alternative model for direct effect of S1 on *sodB* degradation. As Hfq,  
300 S1 might be a partner to recruit the RNA degradosome at the proper site of the target  
301 mRNA. (C) A possible role of S1 in the activation of translation of *shiA* mRNA. RyhB  
302 together with Hfq favors the recruitment of the initiation ribosomal complex, which  
303 in turn stabilizes the mRNA. An unpaired AU rich sequence upstream the SD sequence  
304 might be the binding site for S1. This binding would facilitate the recruitment of the  
305 ribosome.

306

307 **Table legend**

308

309 **Table 1: Comparative proteomics and transcriptomics analysis performed on the WT**  
310 **and *rpsAΔ56* mutant strains.** The data are given for genes encoding proteins that are  
311 involved in chemotaxis and motility.

312

313

314

315

| Chemotaxis |          |          |        |          |                                                                                                                                                                                                                                           |
|------------|----------|----------|--------|----------|-------------------------------------------------------------------------------------------------------------------------------------------------------------------------------------------------------------------------------------------|
| Gene       | Proteins |          | mRNAs  |          | description                                                                                                                                                                                                                               |
|            | Log2FC   | p-value  | Log2FC | p-value  |                                                                                                                                                                                                                                           |
| cheA       | -6,46    | 5,79E-11 | -5,87  | 2,22E-33 | Transmission of sensory signals from the chemoreceptors to the flagellar motors. CheA autophosphorylates and transfers its phosphate group to either CheB or CheY.                                                                        |
| cheW       | -3,71    | 1,47E-02 | -5,88  | 1,01E-32 | Transmission of sensory signals from the chemoreceptors to the flagellar motors. It physically bridges CheA to the MCPs (methyl-accepting chemotaxis proteins) to allow regulated phosphotransfer to CheY and CheB.                       |
| cheZ       | -5,69    | 5,67E-07 | -5,40  | 8,17E-28 | Plays an important role in bacterial chemotaxis signal transduction pathway by accelerating the dephosphorylation of phosphorylated CheY.                                                                                                 |
| tsr        | -5,94    | 4,83E-08 | -6,14  | 8,89E-37 | Methyl-accepting chemotaxis protein I, promotes taxis to the attractant L-serine and related amino acids. Is also responsible for chemotaxis away from a wide range of repellents, including leucine, indole, and weak acids.             |
| tar        | -6,38    | 1,96E-10 | -6,18  | 1,98E-36 | Methyl-accepting chemotaxis protein II, promotes taxis to the attractant maltose via an interaction with the periplasmic maltose binding protein. Tar mediates taxis away from the repellents cobalt and nickel.                          |
| tap        | -4,51    | 1,06E-03 | -6,48  | 7,36E-39 | Methyl-accepting chemotaxis protein IV, mediates taxis toward dipeptides via an interaction with the periplasmic dipeptide-binding protein.                                                                                               |
| malE       | -2,16    | 2,68E-10 | 1,85   | 2,88E-03 | Part of the ABC transporter complex MalEFGK involved in maltose/maltodextrin import. Binds maltose and higher maltodextrins. MalE with bound substrate is also able to bind to the chemoreceptor Tar to induce chemotaxis toward maltose. |
| mgIB       | -2,23    | 6,81E-23 | 2,42   | 2,81E-05 | D-galactose-binding periplasmic protein involved in the active transport of galactose and glucose. It plays a role in the chemotaxis towards the two sugars by interacting with the trg chemoreceptor.                                    |

| Flagellum |          |          |        |          |                                                                                                                                                                                                                                                                                       |
|-----------|----------|----------|--------|----------|---------------------------------------------------------------------------------------------------------------------------------------------------------------------------------------------------------------------------------------------------------------------------------------|
| Gene      | Proteins |          | mRNAs  |          | description                                                                                                                                                                                                                                                                           |
|           | Log2FC   | p-value  | Log2FC | p-value  |                                                                                                                                                                                                                                                                                       |
| flgD      | -5,31    | 1,26E-05 | -2,39  | 9,85E-06 | Basal-body rod modification and hook formation. May act as a scaffolding protein.                                                                                                                                                                                                     |
| flgE      | -3,50    | 3,21E-07 | -2,64  | 4,80E-07 | Flagellar hook protein.                                                                                                                                                                                                                                                               |
| flgK      | -3,42    | 2,90E-02 | -3,80  | 1,57E-14 | Flagellar hook-associated protein 1.                                                                                                                                                                                                                                                  |
| fliD      | -3,42    | 2,90E-02 | -4,12  | 8,07E-13 | Flagellar hook-associated protein 2, required for the morphogenesis and for the elongation of the flagellar filament.                                                                                                                                                                 |
| flgL      | -4,35    | 2,02E-03 | -3,75  | 7,46E-15 | Flagellar hook-associated protein 3.                                                                                                                                                                                                                                                  |
| flgG      | -3,71    | 1,47E-02 | -3,01  | 4,75E-09 | Flagellar basal-body rod protein.                                                                                                                                                                                                                                                     |
| flgA      | -3,42    | 2,90E-02 | -1,84  | 9,55E-04 | Flagella basal body involved in the P-ring formation.                                                                                                                                                                                                                                 |
| flgH      | -3,71    | 1,71E-05 | -2,91  | 6,05E-09 | Flagellar L-ring protein assembles around the rod.                                                                                                                                                                                                                                    |
| flgI      | -3,42    | 2,90E-02 | -2,81  | 1,90E-08 | Flagellar protein assembles around the rod to form the L-ring.                                                                                                                                                                                                                        |
| flgN      | -3,71    | 1,47E-02 | -2,90  | 3,67E-07 | Flagella synthesis protein required for the efficient initiation of filament assembly.                                                                                                                                                                                                |
| fliC      | -5,04    | 1,10E-57 | -5,83  | 9,65E-34 | Flagellin, subunit protein which polymerizes to form the filaments of bacterial flagella.                                                                                                                                                                                             |
| fliH      | -4,91    | 1,56E-04 | -2,91  | 2,62E-09 | Needed for flagellar regrowth and assembly.                                                                                                                                                                                                                                           |
| fliM      | -5,82    | 1,65E-07 | -2,68  | 9,94E-07 | Flagellar motor switch. Together with FliG and FliN forms the C ring, located at the base of the basal body. This complex interacts with the CheY and CheZ chemotaxis proteins, in addition to contacting components of the motor that determine the direction of flagellar rotation. |
| fliG      | -2,32    | 1,00E-03 | -2,70  | 9,93E-08 | Flagellar motor switch. Together with FliM and FliN forms the C ring, located at the base of the basal body. This complex interacts with the CheY and CheZ chemotaxis proteins, in addition to contacting components of the motor that determine the direction of flagellar rotation. |
| frdA      | -2,96    | 8,02E-15 | -0,26  | 5,97E-01 | Fumarate reductase flavoprotein, interacts directly with the FliG subunit of the flagellar motor and enhances clockwise rotation likely by stabilising the motor's clockwise state.                                                                                                   |
| ycgR      | -3,42    | 2,90E-02 | -3,48  | 1,33E-10 | Flagellar brake protein, regulating swimming and swarming in a (c-di-GMP)-dependent manner.                                                                                                                                                                                           |

| Regulation |          |          |        |          |                                                                                                                                                                                                                                                                                                   |
|------------|----------|----------|--------|----------|---------------------------------------------------------------------------------------------------------------------------------------------------------------------------------------------------------------------------------------------------------------------------------------------------|
| Gene       | Proteins |          | mRNAs  |          | description                                                                                                                                                                                                                                                                                       |
|            | Log2FC   | p-value  | Log2FC | p-value  |                                                                                                                                                                                                                                                                                                   |
| fliA       | -3,95    | 1,70E-06 | -2,41  | 1,14E-05 | RNA polymerase sigma factor which controls the expression of flagella-related genes.                                                                                                                                                                                                              |
| flgM       | -1,48    | 1,52E-03 | -2,62  | 3,40E-05 | Responsible for the coupling of flagellin expression to flagellar assembly by preventing expression of the flagellin genes when a component of the middle class of proteins is defective. It negatively regulates flagellar genes by inhibiting the activity of FliA by directly binding to FliA. |
| cobB       | -2,18    | 4,79E-02 | -1,25  | 2,11E-02 | NAD-dependent protein deacylase, modulates the activities of several proteins which are inactive in their acylated form, including chemotaxis protein CheY.                                                                                                                                       |
| acs        | 1,33     | 4,11E-06 | 1,59   | 3,06E-03 | Acetyl-coenzyme A synthetase, acetylates CheY, the response regulator involved in flagellar movement and chemotaxis.                                                                                                                                                                              |

Figure 1

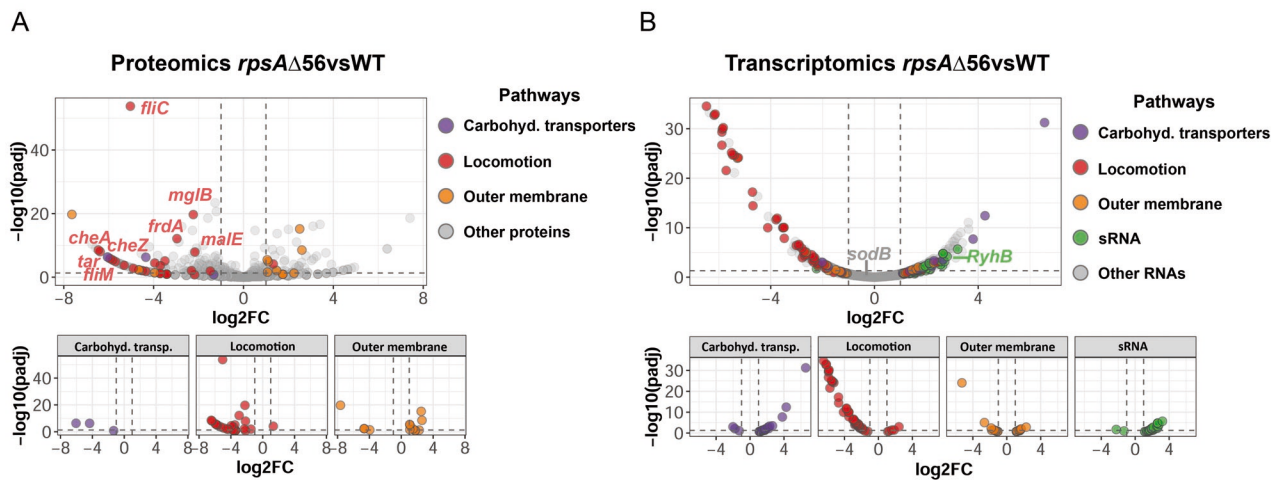

**Figure 1: Comparison of gene expression in wild-type (WT) and mutant strains by proteomic and RNA-seq analysis.** (A) Comparative proteomic analysis of the proteins expressed in the WT and in the *rpsA*Δ56 strain. The threshold was set at an induction fold of 2 (P-value <0.05). Several proteins are colored according to the metabolic and functional pathways to which they belong. (B) Comparative RNA-seq analysis of the RNA expressed in the WT and in the *rpsA*Δ56 strain. The threshold was set at an induction fold of 2 (P-value <0.05). The raw data are provided in Table S1 (proteomic analysis WT vs *rpsA*Δ56 strains) and Table S2 (RNA-seq analysis WT vs *rpsA*Δ56 strains).

**Figure 2**

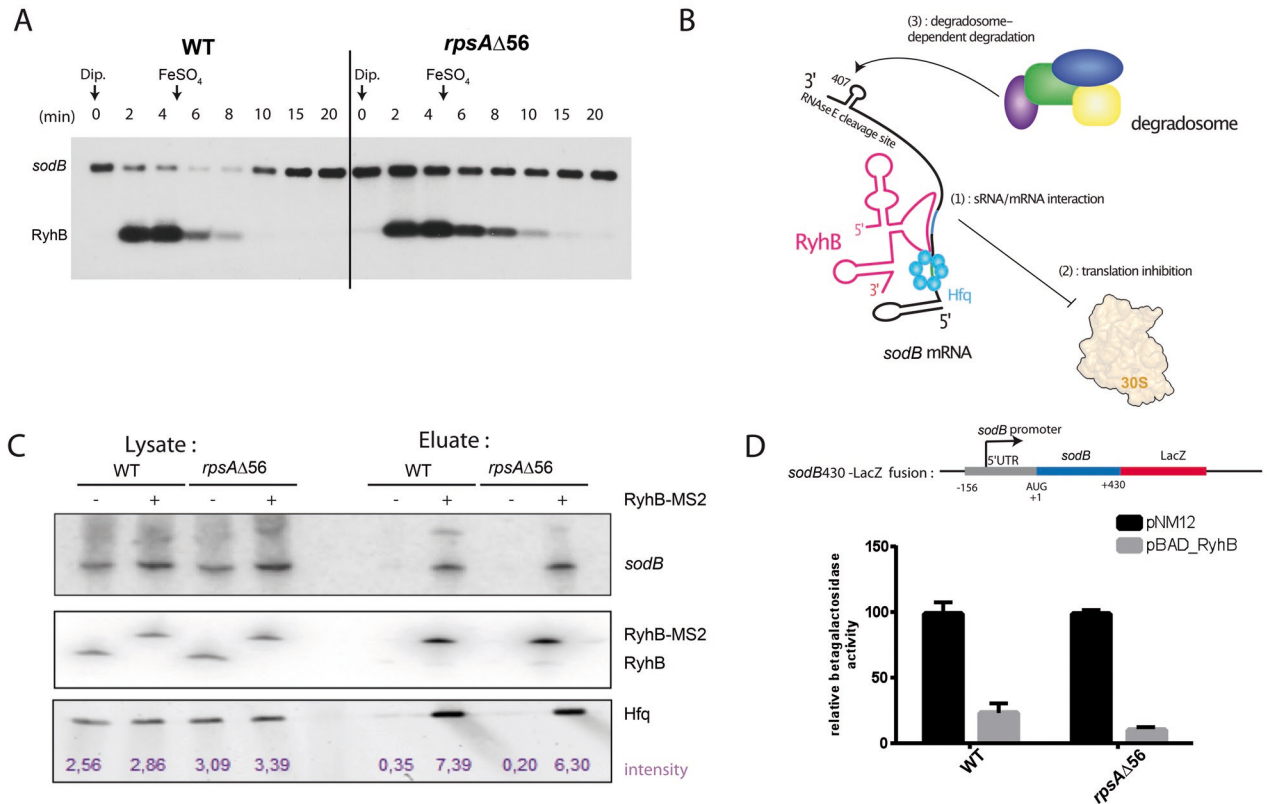

**Figure 2: The deletion of S1 C-terminal domains perturbs RyhB-mediated *sodB* degradation.**

(A) Northern blot analysis was performed using a labeled probe against either *sodB* or RyhB. Total RNA extracts were prepared from WT and *rpsAΔ56* cultures in LB at 37°C. At OD<sub>600</sub>=0.4, 250 μM 2,2'-dipyridyl was added to the culture to induce RyhB. After 5 min, 100 μM of FeSO<sub>4</sub> was added to specifically inhibit RyhB synthesis. The same samples were run on another gel for 5S rRNA (5S) detection, as a loading control. (B) RyhB-mediated *sodB* regulation has been well described, and occurs in three steps: (1) sRNA-mRNA form a complex together with the protein Hfq, (2) RyhB inhibits translation initiation, and induces (3) rapid degradation of the sRNA/mRNA duplex by the RNA degradosome. (C) Northern Blot analysis performed on RNA crude extracts prepared from WT and mutant *rpsAΔ56* strains expressing RyhB fused with the MS2 tag [38] and purified on affinity chromatography. The presence of *sodB* and RyhB was monitored with appropriate labeled probes, and anti-FLAG antibodies were used for Hfq<sup>3xFLAG</sup> Western Blot analysis. The synthesis of MS2-RyhB (+) and RyhB (control) expressed from a pBAD plasmid, was induced by the addition of 0.1 % arabinose in the indicated lanes. (D) Analysis of β-galactosidase synthesis from the *sodB*<sub>430</sub>-*lacZ* translational fusion integrated into the chromosome of the MG1655 (WT) and mutant (*rpsAΔ56*) strains in presence or absence of RyhB. The *lacZ* gene was fused to *sodB* containing 430 nucleotides of its coding region from the AUG including the major RNase E cleavage site. Strains carried either an empty vector (pNM12; black) or a pBAD-*ryhB* (grey). RyhB expression was induced by addition of 0.1% arabinose. Signals from each strain were normalized according to the corresponding empty vector. Data are representative of three independent experiments.

Figure 3

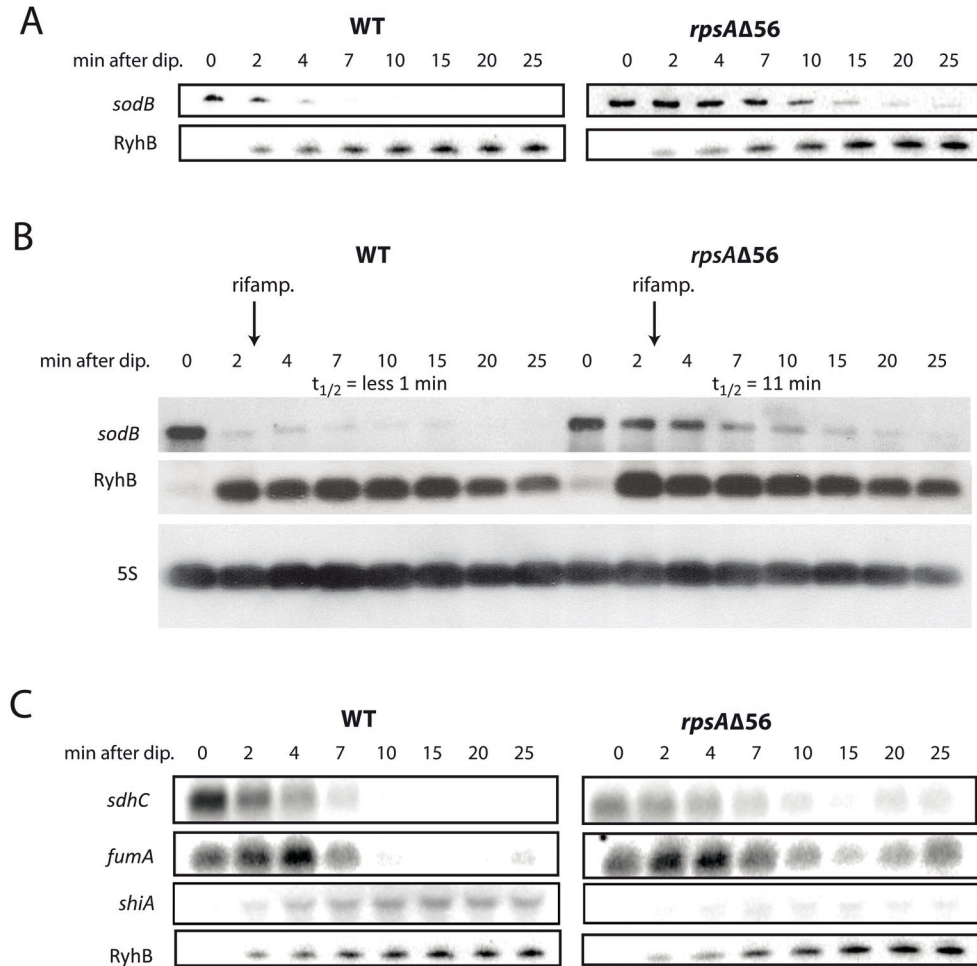

**Figure 3: The RNA degradosome requires the C-terminal domains of S1 to induce fast RyhB-mediated degradation of *sodB*.** (A) Same legend as in Figure 2A, except that  $\text{FeSO}_4$  was not added to the culture to visualize longer degradation pattern. The results show that in the absence of the last two domains of S1, *sodB* mRNA is degraded in a much slower manner in response to RyhB induction than in the WT strain. (B) Measurements of the half-life of *sodB* mRNA in the WT and *rpsAΔ56* mutant strains. The experiment was done by adding rifampicin at 2 min (2,2'-dipyridyl induction being the  $t=0$ ), to block the transcription and to visualize the degradation of *sodB*.  $t_{1/2}$  represents the half-life which was derived after quantification of the autoradiographies. RyhB and 5S were detected using the same RNA samples, which were run on different gels in parallel. (C) Analysis of the mRNAs, which belong to the RyhB regulon. Same legend as in Figure 3A.



**Figure 4**

**A**

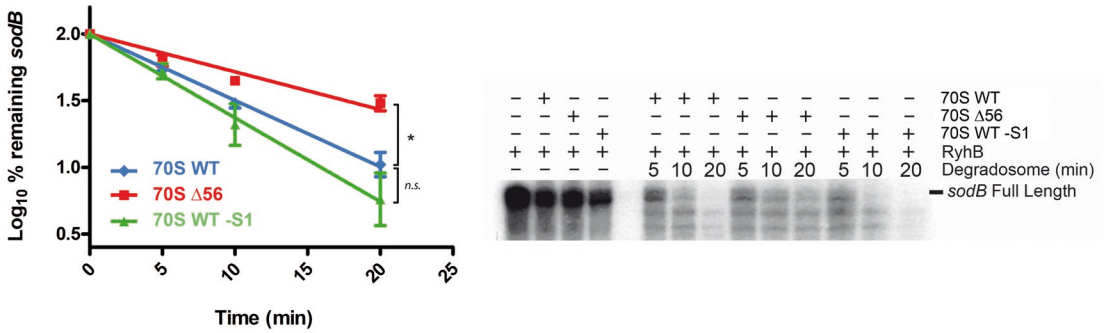

**B**

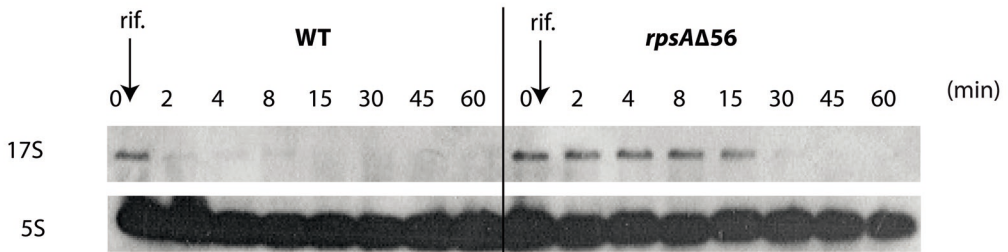

**C**

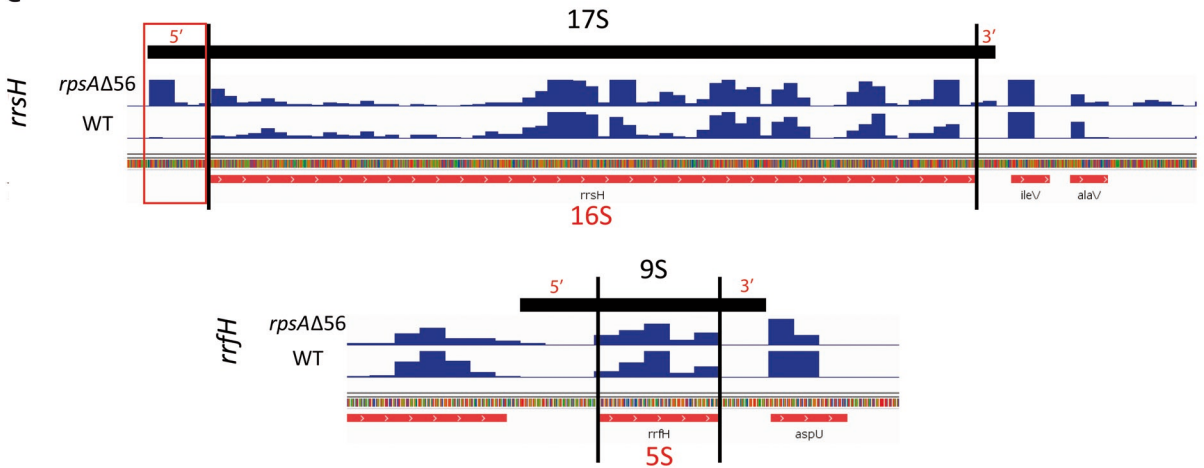

**Figure 4: The last two domains of S1 are required for 16S rRNA maturation but not for 5S maturation.**

(A) *In vitro* reconstitution of *sodB* degradation using the purified RNA degradosome. Uniformly radiolabeled *sodB* mRNA was incubated in presence of RyhB, the purified RNA degradosome, and either the WT ribosome containing full length S1, the WT ribosome from which S1 was removed before the experiment, or the *rpsAΔ56* ribosomes. The degradation of *sodB* mRNA was followed over time (5, 10, 20 min) and the RNA fragments were fractionated on an 8% polyacrylamide-7 M urea gel electrophoresis. The signals for the remaining full length *sodB* mRNA were quantified with ImageQuant TL software (GE Healthcare Life Sciences) on three independent experiments to calculate the error bars. (B) Measurements of the half-life of the 17S rRNA precursor using Northern Blot analysis. Total RNA was extracted from the WT and mutant *rpsAΔ56* strains at various time points after addition of rifampicin. A specific probe revealed the 5' region of the 17S. (C) IGV visualization of the rRNA reads obtained by ribosome profiling performed in WT and *rpsAΔ56* strains. Accumulation of reads corresponding to 5' leader of 17S precursor is observed in the mutant strain. We showed the data on *rrsH* gene as representative of the 7 rRNA operons. In comparison, reads aligned to the 5S precursor region (9S) are shown (*rrfH* gene).

**Figure 5**

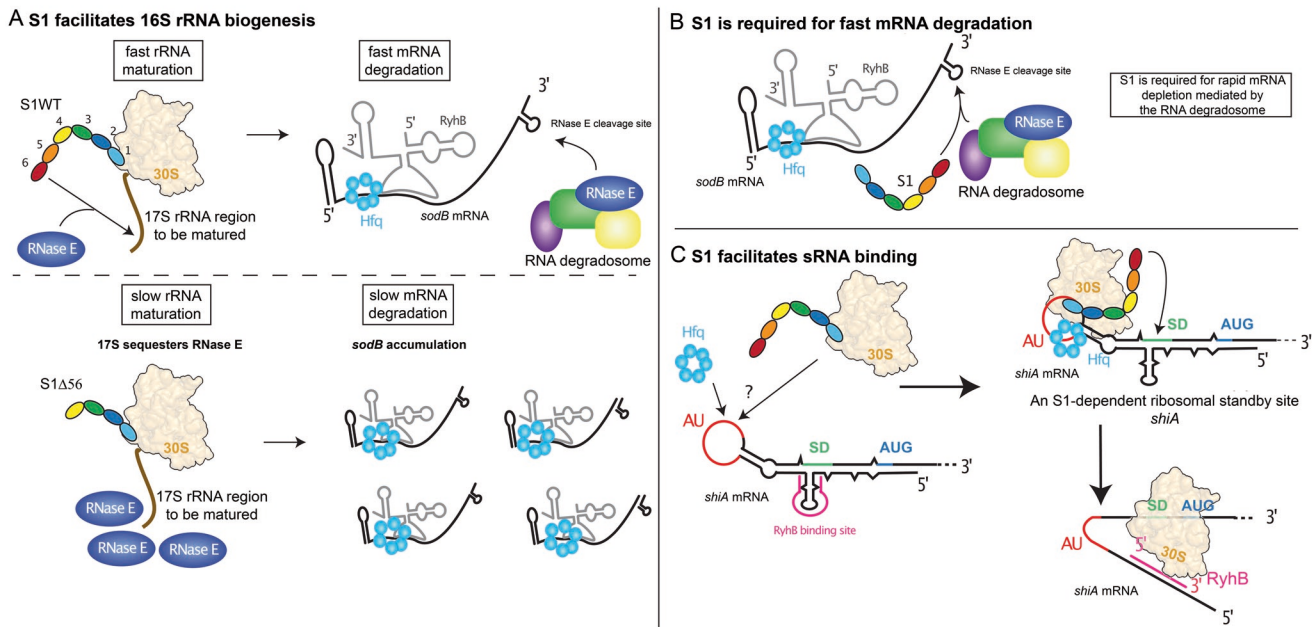

**Figure 5: Possible models for S1 action.**

(A) Model for an indirect effect of S1 on *sodB* degradation. (left) S1 enhances the kinetics of 17S rRNA maturation. In WT strain, RyhB-dependent degradation of *sodB* is efficient. In the mutant *rpsA* $\Delta$ 56 strain, the 17S is not efficiently matured, and it is proposed that RNase E might remain associated for a longer time with the 17S to cleave it. As the results, the kinetics of the degradation of *sodB* mRNA is altered. (B) Alternative model for direct effect of S1 on *sodB* degradation. As Hfq, S1 might be a partner to recruit the RNA degradosome at the proper site of the target mRNA. (C) A possible role of S1 in the activation of translation of *shiA* mRNA. RyhB together with Hfq favors the recruitment of the initiation ribosomal complex, which in turn stabilizes the mRNA. An unpaired AU rich sequence upstream the SD sequence might be the binding site for S1. This binding would facilitate the recruitment of the ribosome.
